# Supplementary material for: Energy and Electronic Properties of Nanostructures Based on the CL-20 Framework with the Replacement of the Carbon Atoms by Silicon and Germanium: A Density Functional Theory Study
Source: MDPI journal article supplement (doi:10.3390/ma15196577), 2022-09-22
Supplement: s1 [file s1]

## **Supplementary Materials**

**for**

# **Energy and electronic properties of nanostructures based on CL-20 framework with replacement of the carbon atoms by silicon and germanium: A density functional theory study**

Margarita A. Gimaldinova<sup>1</sup>, Mikhail M. Maslov<sup>1,2,\*</sup>, Konstantin P. Katin<sup>1,2</sup>

e-mail: [Mike.Maslov@gmail.com](mailto:Mike.Maslov@gmail.com)

<sup>1</sup>Nanoengineering in Electronics, Spintronics and Photonics Institute, National Research Nuclear University “MEPhI”, Kashirskoe Shosse 31, Moscow 115409, Russia

<sup>2</sup>Laboratory of Computational Design of Nanostructures, Nanodevices, and Nanotechnologies, Research Institute for the Development of Scientific and Educational Potential of Youth, Aviatorov str. 14/55, Moscow 119620, Russia

**Table S1.** Binding energy ( $E_b$ ), HOMO energy ( $\varepsilon_H$ ), LUMO energy ( $\varepsilon_L$ ), ionization potential (IP), electron affinity (EA), HOMO-LUMO gap ( $\Delta_{HL}$ ), chemical potential ( $\mu$ ), electronegativity ( $\chi$ ), hardness ( $\eta$ ), softness ( $S$ ), electrophilicity ( $\omega$ ), and maximum electronic charge accepted ( $\Delta N_{\max}$ ) of  $\text{Si}_n\text{CL-20}$ , obtaining at the DFT/B3LYP/6-311G(d,p) level of theory.

**Note:**  $n$  is the number of silicon atoms in the system that replaced the carbon atoms,  $k$  shows the numbers of substituted atoms in accordance with the numbering in the figure S1.

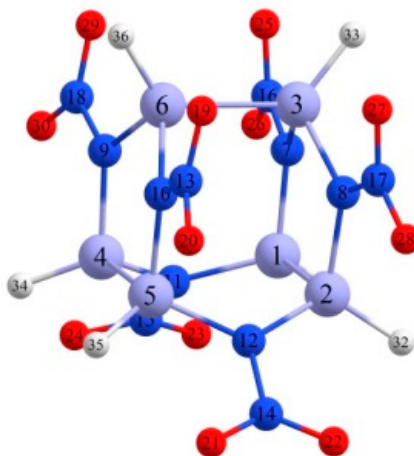

**Figure S1.** The isolated molecule  $\text{Si}_6\text{CL-20}$  with numbered silicon atoms.

| The structure         | $n$ | The number of modification | $k$ | $E_b$ , eV/atom | $\varepsilon_H$ , eV | $\varepsilon_L$ , eV | IP, eV | EA, eV | $\Delta_{HL}$ , eV | $\mu$ , eV | $\chi$ , eV | $\eta$ , eV | $S$ , eV <sup>-1</sup> | $\omega$ , eV | $\Delta N_{\max}$ , a.u. |
|-----------------------|-----|----------------------------|-----|-----------------|----------------------|----------------------|--------|--------|--------------------|------------|-------------|-------------|------------------------|---------------|--------------------------|
| CL-20                 | 0   | 1                          | —   | 4.026           | -8.807               | -3.114               | 8.807  | 3.114  | 5.693              | -5.960     | 5.960       | 2.84<br>7   | 0.176                  | 6.240         | 2.09<br>4                |
| Si <sub>1</sub> CL-20 | 1   | 1                          | 2   | 3.970           | -8.693               | -2.998               | 8.693  | 2.998  | 5.695              | -5.845     | 5.845       | 2.84<br>7   | 0.176                  | 6.000         | 2.05<br>3                |
|                       |     | 2                          | 1   | 3.970           | -8.692               | -2.998               | 8.692  | 2.998  | 5.694              | -5.845     | 5.845       | 2.84<br>7   | 0.176                  | 6.000         | 2.05<br>3                |
|                       |     | 3                          | 3   | 3.971           | -8.900               | -2.977               | 8.900  | 2.977  | 5.923              | -5.939     | 5.939       | 2.96<br>1   | 0.169                  | 5.954         | 2.00<br>5                |

|                       |   |   |     |       |        |        |       |       |       |        |       |                  |       |       |                  |
|-----------------------|---|---|-----|-------|--------|--------|-------|-------|-------|--------|-------|------------------|-------|-------|------------------|
| Si <sub>2</sub> CL-20 | 2 | 1 | 1,2 | 3.908 | -8.535 | -3.009 | 8.535 | 3.009 | 5.525 | -5.772 | 5.772 | $\frac{2.76}{3}$ | 0.181 | 6.029 | $\frac{2.08}{9}$ |
|                       |   | 2 | 1,6 | 3.913 | -8.686 | -3.043 | 8.686 | 3.043 | 5.644 | -5.865 | 5.865 | $\frac{2.82}{2}$ | 0.177 | 6.094 | $\frac{2.07}{8}$ |
|                       |   | 3 | 2,6 | 3.913 | -8.687 | -3.043 | 8.687 | 3.043 | 5.644 | -5.865 | 5.865 | $\frac{2.82}{2}$ | 0.177 | 6.095 | $\frac{2.07}{8}$ |
|                       |   | 4 | 3,6 | 3.913 | -8.720 | -2.955 | 8.970 | 2.955 | 5.765 | -5.837 | 5.837 | $\frac{2.88}{2}$ | 0.173 | 5.910 | $\frac{2.02}{5}$ |

**Table S1.**

| <i>The structure</i>  | <i>n</i> | <i>The number of modification</i> | <i>k</i> | $E_b$ , eV/atom | $\varepsilon_H$ , eV | $\varepsilon_L$ , eV | IP, eV | EA, eV | $\Delta_{HL}$ , eV | $\mu$ , eV | $\chi$ , eV | $\eta$ , eV      | $S$ , eV <sup>-1</sup> | $\omega$ , eV | $\Delta N_{ma}$ , a.u. |
|-----------------------|----------|-----------------------------------|----------|-----------------|----------------------|----------------------|--------|--------|--------------------|------------|-------------|------------------|------------------------|---------------|------------------------|
|                       |          | 5                                 | 1,4      | 3.914           | -8.583               | -3.062               | 8.583  | 3.062  | 5.521              | -5.822     | 5.822       | $\frac{2.76}{0}$ | 0.181                  | 6.140         | $\frac{2.10}{9}$       |
|                       |          | 6                                 | 1,5      | 3.916           | -8.658               | -2.925               | 8.658  | 2.925  | 5.733              | -5.792     | 5.792       | $\frac{2.86}{6}$ | 0.174                  | 5.851         | $\frac{2.02}{0}$       |
|                       |          | 7                                 | 2,4      | 3.916           | -8.657               | -2.924               | 8.657  | 2.924  | 5.733              | -5.791     | 5.791       | $\frac{2.86}{6}$ | 0.174                  | 5.849         | $\frac{2.02}{0}$       |
|                       |          | 8                                 | 1,3      | 3.921           | -8.768               | -3.050               | 8.768  | 3.050  | 5.718              | -5.909     | 5.909       | $\frac{2.85}{9}$ | 0.175                  | 6.106         | $\frac{2.06}{7}$       |
|                       |          | 9                                 | 2,3      | 3.921           | -8.759               | -3.052               | 8.759  | 3.052  | 5.707              | -5.906     | 5.906       | $\frac{2.85}{4}$ | 0.175                  | 6.111         | $\frac{2.07}{0}$       |
| Si <sub>3</sub> CL-20 | 3        | 1                                 | 1,2,6    | 3.850           | -8.509               | -2.991               | 8.509  | 2.991  | 5.517              | -5.750     | 5.750       | $\frac{2.75}{9}$ | 0.181                  | 5.992         | $\frac{2.08}{4}$       |
|                       |          | 2                                 | 1,2,5    | 3.853           | -8.642               | -3.046               | 8.642  | 3.046  | 5.596              | -5.844     | 5.844       | $\frac{2.79}{8}$ | 0.179                  | 6.103         | $\frac{2.08}{9}$       |
|                       |          | 3                                 | 1,2,4    | 3.853           | -8.638               | -3.044               | 8.638  | 3.044  | 5.593              | -5.841     | 5.841       | $\frac{2.79}{7}$ | 0.179                  | 6.100         | $\frac{2.08}{9}$       |
|                       |          | 4                                 | 1,2,3    | 3.860           | -8.657               | -3.161               | 8.657  | 3.161  | 5.496              | -5.909     | 5.909       | $\frac{2.74}{8}$ | 0.182                  | 6.353         | $\frac{2.15}{0}$       |
|                       |          | 5                                 | 2,3,6    | 3.863           | -8.635               | -3.048               | 8.635  | 3.048  | 5.587              | -5.842     | 5.842       | $\frac{2.79}{3}$ | 0.179                  | 6.108         | $\frac{2.09}{1}$       |
|                       |          | 6                                 | 1,3,6    | 3.863           | -8.636               | -3.047               | 8.636  | 3.047  | 5.589              | -5.841     | 5.841       | $\frac{2.79}{4}$ | 0.179                  | 6.106         | $\frac{2.09}{0}$       |

|                       |   |    |             |       |        |        |       |       |       |        |       |                  |       |       |                  |
|-----------------------|---|----|-------------|-------|--------|--------|-------|-------|-------|--------|-------|------------------|-------|-------|------------------|
|                       |   | 7  | 1,3,5       | 3.865 | -8.625 | -2.964 | 8.625 | 2.964 | 5.662 | -5.795 | 5.795 | $\frac{2.83}{1}$ | 0.177 | 5.931 | $\frac{2.04}{7}$ |
|                       |   | 8  | 2,3,4       | 3.865 | -8.627 | -2.964 | 8.627 | 2.964 | 5.663 | -5.795 | 5.795 | $\frac{2.83}{1}$ | 0.177 | 5.931 | $\frac{2.04}{7}$ |
|                       |   | 9  | 1,3,4       | 3.865 | -8.560 | -3.077 | 8.560 | 3.077 | 5.483 | -5.818 | 5.818 | $\frac{2.74}{2}$ | 0.182 | 6.174 | $\frac{2.12}{2}$ |
|                       |   | 10 | 2,3,5       | 3.865 | -8.556 | -3.079 | 8.556 | 3.079 | 5.477 | -5.818 | 5.818 | $\frac{2.73}{9}$ | 0.183 | 6.179 | $\frac{2.12}{4}$ |
| Si <sub>4</sub> CL-20 | 4 | 1  | 1,2,4,5     | 3.794 | -8.610 | -3.148 | 8.610 | 3.148 | 5.462 | -5.879 | 5.879 | $\frac{2.73}{1}$ | 0.183 | 6.329 | $\frac{2.15}{3}$ |
|                       |   | 2  | 1,2,3,6     | 3.802 | -8.578 | -3.127 | 8.578 | 3.127 | 5.452 | -5.852 | 5.852 | $\frac{2.72}{6}$ | 0.183 | 6.282 | $\frac{2.14}{7}$ |
|                       |   | 3  | 1,2,5,6     | 3.802 | -8.497 | -3.061 | 8.497 | 3.061 | 5.437 | -5.779 | 5.779 | $\frac{2.71}{8}$ | 0.184 | 6.143 | $\frac{2.12}{6}$ |
|                       |   | 4  | 1,2,4,6     | 3.803 | -8.497 | -3.061 | 8.497 | 3.061 | 5.436 | -5.779 | 5.779 | $\frac{2.71}{8}$ | 0.184 | 6.144 | $\frac{2.12}{6}$ |
|                       |   | 5  | 1,2,3,5     | 3.806 | -8.577 | -3.116 | 8.577 | 3.116 | 5.462 | -5.846 | 5.846 | $\frac{2.73}{1}$ | 0.183 | 6.257 | $\frac{2.14}{1}$ |
|                       |   | 6  | 1,2,3,4     | 3.806 | -8.575 | -3.121 | 8.575 | 3.121 | 5.454 | -5.848 | 5.848 | $\frac{2.72}{7}$ | 0.183 | 6.270 | $\frac{2.14}{4}$ |
|                       |   | 7  | 1,3,4,6     | 3.814 | -8.475 | -3.085 | 8.475 | 3.085 | 5.390 | -5.780 | 5.780 | $\frac{2.69}{5}$ | 0.186 | 6.197 | $\frac{2.14}{4}$ |
|                       |   | 8  | 1,3,5,6     | 3.815 | -8.588 | -3.007 | 8.588 | 3.007 | 5.581 | -5.798 | 5.798 | $\frac{2.79}{1}$ | 0.179 | 6.023 | $\frac{2.07}{8}$ |
|                       |   | 9  | 2,3,4,6     | 3.815 | -8.588 | -3.008 | 8.588 | 3.008 | 5.580 | -5.798 | 5.798 | $\frac{2.79}{0}$ | 0.179 | 6.024 | $\frac{2.07}{8}$ |
| Si <sub>5</sub> CL-20 | 5 | 1  | 1,2,3,4,5   | 3.747 | -8.449 | -3.205 | 8.449 | 3.205 | 5.243 | -5.827 | 5.827 | $\frac{2.62}{2}$ | 0.191 | 6.476 | $\frac{2.22}{3}$ |
|                       |   | 2  | 1,2,3,4,6   | 3.755 | -8.530 | -3.120 | 8.530 | 3.120 | 5.410 | -5.825 | 5.825 | $\frac{2.70}{5}$ | 0.185 | 6.271 | $\frac{2.15}{3}$ |
|                       |   | 3  | 1,2,3,5,6   | 3.755 | -8.530 | -3.120 | 8.530 | 3.120 | 5.409 | -5.825 | 5.825 | $\frac{2.70}{5}$ | 0.185 | 6.272 | $\frac{2.15}{4}$ |
| Si <sub>6</sub> CL-20 | 6 | 1  | 1,2,3,4,5,6 | 3.699 | -8.556 | -3.217 | 8.556 | 3.217 | 5.339 | -5.887 | 5.887 | $\frac{2.66}{9}$ | 0.187 | 6.491 | $\frac{2.20}{5}$ |

**Table S2.** Binding energy ( $E_b$ ), HOMO energy ( $\epsilon_H$ ), LUMO energy ( $\epsilon_L$ ), ionization potential (IP), electron affinity (EA), HOMO-LUMO gap ( $\Delta_{HL}$ ), chemical potential ( $\mu$ ), electronegativity ( $\chi$ ), hardness ( $\eta$ ), softness ( $S$ ), electrophilicity ( $\omega$ ), and maximum electronic charge accepted ( $\Delta N_{\max}$ ) of  $\text{Ge}_n\text{CL-20}$ , obtaining at the DFT/B3LYP/6-311G(d,p) level of theory.

**Note:**  $n$  is the number of germanium atoms in the system that replaced the carbon atoms,  $k$  shows the numbers of substituted atoms in accordance with the numbering in the figure S1.

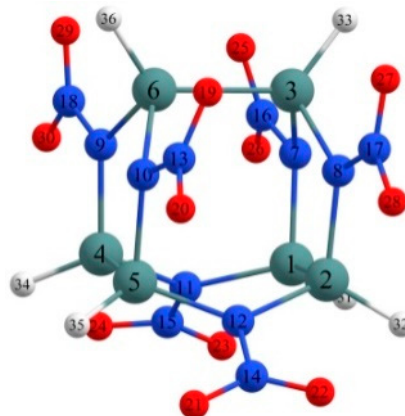

**Figure S2.** The isolated molecule  $\text{Ge}_6\text{CL-20}$  with numbered silicon atoms.

| The structure             | $n$ | The number of modification | $k$ | $E_b$ , eV/atom | $\epsilon_H$ , eV | $\epsilon_L$ , eV | IP, eV | EA, eV | $\Delta_{HL}$ , eV | $\mu$ , eV | $\chi$ , eV | $\eta$ , eV | $S$ , eV <sup>-1</sup> | $\omega$ , eV | $\Delta N_{\max}$ , a.u. |
|---------------------------|-----|----------------------------|-----|-----------------|-------------------|-------------------|--------|--------|--------------------|------------|-------------|-------------|------------------------|---------------|--------------------------|
| CL-20                     | 0   | 1                          | —   | 4.026           | -8.807            | -3.114            | 8.807  | 3.114  | 5.693              | -5.960     | 5.960       | 2.847       | 0.176                  | 6.240         | 2.094                    |
| $\text{Ge}_1\text{CL-20}$ | 1   | 1                          | 2   | 3.916           | -8.593            | -2.943            | 8.593  | 2.943  | 5.650              | -5.768     | 5.768       | 2.825       | 0.177                  | 5.889         | 2.042                    |
|                           |     | 2                          | 1   | 3.916           | -8.591            | -2.952            | 8.591  | 2.952  | 5.639              | -5.772     | 5.772       | 2.819       | 0.177                  | 5.908         | 2.047                    |
|                           |     | 3                          | 3   | 3.920           | -8.772            | -2.957            | 8.772  | 2.957  | 5.814              | -5.865     | 5.865       | 2.907       | 0.172                  | 5.915         | 2.017                    |
| $\text{Ge}_2\text{CL-20}$ | 2   | 1                          | 1,4 | 3.806           | -8.473            | -2.976            | 8.473  | 2.976  | 5.497              | -5.724     | 5.724       | 2.748       | 0.182                  | 5.961         | 2.083                    |
|                           |     | 2                          | 2,4 | 3.808           | -8.466            | -2.864            | 8.466  | 2.864  | 5.601              | -5.665     | 5.665       | 2.801       | 0.179                  | 5.729         | 2.023                    |
|                           |     | 3                          | 1,5 | 3.808           | -8.467            | -2.863            | 8.467  | 2.863  | 5.604              | -5.665     | 5.665       | 2.802       | 0.178                  | 5.726         | 2.022                    |

|   |     |       |        |        |       |       |       |        |       |       |       |       |       |
|---|-----|-------|--------|--------|-------|-------|-------|--------|-------|-------|-------|-------|-------|
| 4 | 2,6 | 3.810 | -8.499 | -3.115 | 8.499 | 3.115 | 5.384 | -5.807 | 5.807 | 2.692 | 0.186 | 6.263 | 2.157 |
| 5 | 1,6 | 3.810 | -8.495 | -3.118 | 8.495 | 3.118 | 5.378 | -5.807 | 5.807 | 2.689 | 0.186 | 6.270 | 2.160 |

**Table S2.**

| The structure         | $n$ | The number of modification | $k$       | $E_b$ , eV/atom | $\varepsilon_H$ , eV | $\varepsilon_L$ , eV | IP, eV | EA, eV | $\Delta_{HL}$ , eV | $\mu$ , eV | $\chi$ , eV | $\eta$ , eV | $S_1$ , eV <sup>-1</sup> | $\omega$ , eV | $\Delta N_{max}$ , a.u. |
|-----------------------|-----|----------------------------|-----------|-----------------|----------------------|----------------------|--------|--------|--------------------|------------|-------------|-------------|--------------------------|---------------|-------------------------|
|                       |     | 6                          | 1,3       | 3.815           | -8.627               | -2.925               | 8.627  | 2.925  | 5.702              | -5.776     | 5.776       | 2.851       | 0.175                    | 5.851         | 2.026                   |
|                       |     | 7                          | 2,3       | 3.815           | -8.627               | -2.925               | 8.627  | 2.925  | 5.703              | -5.776     | 5.776       | 2.851       | 0.175                    | 5.850         | 2.026                   |
|                       |     | 8                          | 1,2       | 3.818           | -8.482               | -3.036               | 8.482  | 3.036  | 5.446              | -5.759     | 5.759       | 2.723       | 0.184                    | 6.090         | 2.115                   |
|                       |     | 9                          | 3,6       | 3.823           | -8.579               | -3.023               | 8.579  | 3.023  | 5.556              | -5.801     | 5.801       | 2.778       | 0.180                    | 6.057         | 2.088                   |
| Ge <sub>3</sub> CL-20 | 3   | 1                          | 1,3,5     | 3.705           | -8.411               | -3.018               | 8.411  | 3.018  | 5.393              | -5.714     | 5.714       | 2.697       | 0.185                    | 6.055         | 2.119                   |
|                       |     | 2                          | 2,3,4     | 3.705           | -8.411               | -3.019               | 8.411  | 3.019  | 5.391              | -5.715     | 5.715       | 2.696       | 0.185                    | 6.058         | 2.120                   |
|                       |     | 3                          | 2,3,5     | 3.706           | -8.371               | -2.955               | 8.371  | 2.955  | 5.417              | -5.663     | 5.663       | 2.708       | 0.185                    | 5.920         | 2.090                   |
|                       |     | 4                          | 1,3,4     | 3.706           | -8.353               | -2.947               | 8.353  | 2.947  | 5.406              | -5.650     | 5.650       | 2.703       | 0.185                    | 5.906         | 2.090                   |
|                       |     | 5                          | 1,2,6     | 3.713           | -8.193               | -3.138               | 8.193  | 3.138  | 5.055              | -5.665     | 5.665       | 2.528       | 0.198                    | 6.349         | 2.241                   |
|                       |     | 6                          | 1,2,4     | 3.714           | -8.276               | -3.001               | 8.276  | 3.001  | 5.274              | -5.639     | 5.639       | 2.637       | 0.190                    | 6.028         | 2.138                   |
|                       |     | 7                          | 1,2,5     | 3.714           | -8.276               | -3.001               | 8.276  | 3.001  | 5.275              | -5.638     | 5.638       | 2.638       | 0.190                    | 6.027         | 2.138                   |
|                       |     | 8                          | 1,2,3     | 3.719           | -8.494               | -2.990               | 8.494  | 2.990  | 5.504              | -5.742     | 5.742       | 2.752       | 0.182                    | 5.990         | 2.086                   |
|                       |     | 9                          | 1,3,6     | 3.719           | -8.521               | -3.024               | 8.521  | 3.024  | 5.498              | -5.773     | 5.773       | 2.749       | 0.182                    | 6.061         | 2.100                   |
|                       |     | 10                         | 2,3,6     | 3.719           | -8.522               | -3.025               | 8.522  | 3.025  | 5.496              | -5.773     | 5.773       | 2.748       | 0.182                    | 6.064         | 2.101                   |
| Ge <sub>4</sub> CL-20 | 4   | 1                          | 1,2,3,5   | 3.610           | -8.303               | -2.930               | 8.303  | 2.930  | 5.373              | -5.617     | 5.617       | 2.687       | 0.186                    | 5.871         | 2.091                   |
|                       |     | 2                          | 1,2,3,4   | 3.612           | -8.299               | -2.994               | 8.299  | 2.994  | 5.305              | -5.646     | 5.646       | 2.652       | 0.189                    | 6.010         | 2.129                   |
|                       |     | 3                          | 1,2,4,6   | 3.612           | -8.193               | -3.122               | 8.193  | 3.122  | 5.071              | -5.657     | 5.657       | 2.536       | 0.197                    | 6.311         | 2.231                   |
|                       |     | 4                          | 1,2,5,6   | 3.613           | -8.179               | -3.074               | 8.179  | 3.074  | 5.104              | -5.626     | 5.626       | 2.552       | 0.196                    | 6.202         | 2.205                   |
|                       |     | 5                          | 1,3,4,6   | 3.617           | -8.354               | -2.927               | 8.354  | 2.927  | 5.427              | -5.640     | 5.640       | 2.714       | 0.184                    | 5.861         | 2.078                   |
|                       |     | 6                          | 2,3,4,6   | 3.618           | -8.367               | -2.904               | 8.367  | 2.904  | 5.463              | -5.636     | 5.636       | 2.732       | 0.183                    | 5.814         | 2.063                   |
|                       |     | 7                          | 1,3,5,6   | 3.618           | -8.373               | -2.901               | 8.373  | 2.901  | 5.472              | -5.637     | 5.637       | 2.736       | 0.183                    | 5.807         | 2.060                   |
|                       |     | 8                          | 1,2,4,5   | 3.622           | -8.217               | -3.185               | 8.217  | 3.185  | 5.032              | -5.701     | 5.701       | 2.516       | 0.199                    | 6.459         | 2.266                   |
|                       |     | 9                          | 1,2,3,6   | 3.623           | -8.441               | -3.122               | 8.441  | 3.122  | 5.318              | -5.781     | 5.781       | 2.659       | 0.188                    | 6.285         | 2.174                   |
| Ge <sub>5</sub> CL-20 | 5   | 1                          | 1,2,3,4,5 | 3.512           | -8.124               | -3.027               | 8.124  | 3.027  | 5.097              | -5.576     | 5.576       | 2.549       | 0.196                    | 6.099         | 2.187                   |
|                       |     | 2                          | 1,2,3,5,6 | 3.518           | -8.369               | -2.919               | 8.369  | 2.919  | 5.449              | -5.644     | 5.644       | 2.725       | 0.184                    | 5.845         | 2.071                   |

|                       |   |   |             |       |        |        |       |       |       |        |       |       |       |       |       |
|-----------------------|---|---|-------------|-------|--------|--------|-------|-------|-------|--------|-------|-------|-------|-------|-------|
|                       |   | 3 | 1,2,3,4,6   | 3.518 | -8.362 | -2.929 | 8.362 | 2.929 | 5.433 | -5.645 | 5.645 | 2.717 | 0.184 | 5.865 | 2.078 |
| Ge <sub>6</sub> CL-20 | 6 | 1 | 1,2,3,4,5,6 | 3.426 | -8.398 | -2.971 | 8.398 | 2.971 | 5.427 | -5.684 | 5.684 | 2.714 | 0.184 | 5.953 | 2.095 |

**Table S3.** Binding energy ( $E_b$ ), HOMO energy ( $\varepsilon_H$ ), LUMO energy ( $\varepsilon_L$ ), ionization potential (IP), electron affinity (EA), HOMO-LUMO gap ( $\Delta_{HL}$ ), chemical potential ( $\mu$ ), electronegativity ( $\chi$ ), hardness ( $\eta$ ), softness ( $S$ ), electrophilicity ( $\omega$ ), and maximum electronic charge accepted ( $\Delta N_{\max}$ ) of covalent dimers of the CL-20, Ge5CL-20 and Si5CL-20 systems, obtaining at the DFT/B3LYP/6-311G(d,p) level of theory.

| The dimer |        | $E_b$ ,<br>eV/atom | $\varepsilon_H$ , eV | $\varepsilon_L$ , eV | IP, eV | EA, eV | $\Delta_{HL}$ , eV | $\mu$ , eV | $\chi$ , eV | $\eta$ , eV | $S$ , eV <sup>-1</sup> | $\omega$ , eV | $\Delta N_{\max}$ ,<br>a.u. |
|-----------|--------|--------------------|----------------------|----------------------|--------|--------|--------------------|------------|-------------|-------------|------------------------|---------------|-----------------------------|
| D1-(1)    |        | 4.156              | -7.454               | -2.797               | 7.454  | 2.797  | 4.657              | -5.126     | 5.126       | 2.328       | 0.215                  | 5.641         | 2.201                       |
| Si        | D2-(1) | 3.843              | -7.489               | -3.031               | 7.489  | 3.031  | 4.458              | -5.260     | 5.260       | 2.229       | 0.224                  | 6.207         | 2.360                       |
|           | D2-(2) | 3.843              | -7.478               | -3.061               | 7.478  | 3.061  | 4.462              | -5.247     | 5.247       | 2.231       | 0.224                  | 6.170         | 2.352                       |
|           | D2-(3) | 3.846              | -7.609               | -2.293               | 7.609  | 2.293  | 4.715              | -5.251     | 5.251       | 2.358       | 0.212                  | 5.848         | 2.227                       |
| Ge        | D3-(1) | 3.579              | -7.181               | -2.771               | 7.181  | 2.771  | 4.410              | -4.976     | 4.976       | 2.205       | 0.227                  | 5.614         | 2.257                       |
|           | D3-(2) | 3.579              | -7.124               | -2.780               | 7.124  | 2.780  | 4.345              | -4.952     | 4.952       | 2.172       | 0.230                  | 5.645         | 2.280                       |
|           | D3-(3) | 3.582              | -7.167               | -2.793               | 7.167  | 2.793  | 4.374              | -4.980     | 4.980       | 2.187       | 0.229                  | 5.670         | 2.277                       |
